# Supplementary material for: Proteome Analysis Identified the PPARγ Ligand 15d-PGJ2 as a Novel Drug Inhibiting Melanoma Progression and Interfering with Tumor-Stroma Interaction
Source: PubMed Central journal article supplement (PMC3458105; doi:10.1371/journal.pone.0046103), 2012-09-25
Supplement: pone.0046103.s002.pdf [file pone.0046103.s002.pdf]

**Table S1: IC50 of cells treated with PPAR ligands**

| <b>cell line</b>                  | <b>PPAR ligand</b> | <b>IC50 (μM)</b>                       |
|-----------------------------------|--------------------|----------------------------------------|
| A375 (melanoma cell line)         | ciglitazone        | >100 (1436)                            |
|                                   | troglitazone       | >100 (2584)                            |
|                                   | 15d-PGJ2           | <b>23.4</b>                            |
|                                   | WY-14643           | >800 (14394)                           |
| M24met                            | ciglitazone        | >100 (2913)                            |
|                                   | troglitazone       | >100 (1574)                            |
|                                   | 15d-PGJ2           | <b>25.12</b>                           |
|                                   | WY-14643           | 674.4                                  |
| 1205Lu                            | ciglitazone        | 100.9                                  |
|                                   | troglitazone       | 46.09                                  |
|                                   | 15d-PGJ2           | <b>21.97</b>                           |
|                                   | WY-14643           | 380.9                                  |
| MelJuso                           | ciglitazone        | >100 (2,721e+007)                      |
|                                   | troglitazone       | >100 (580.4)                           |
|                                   | 15d-PGJ2           | <b>37.45</b>                           |
|                                   | WY-14643           | 791.5                                  |
| HUVEC (endothelial cells)         | ciglitazone        | >100 (16242)                           |
|                                   | troglitazone       | >100 (1615)                            |
|                                   | 15d-PGJ2           | <b>85.23, 83.7</b> (2nd isolated cell) |
|                                   | WY-14643           | >800 (835)                             |
| LEC (lymphatic endothelial cells) | 15d-PGJ2           | <b>70.84</b>                           |
| <b>cell line</b>                  | <b>PPAR ligand</b> | <b>IC50 (μM)</b>                       |
| NHDF (normal skin fibroblasts)    | 15d-PGJ2           | <b>127,70</b>                          |
| TF (old)                          | 15d-PGJ2           | <b>92,78</b>                           |
| MP9 fibroblasts                   | 15d-PGJ2           | <b>46,92</b>                           |
| MP10 fibrosblasts                 | 15d-PGJ2           | <b>44,40</b>                           |
| MP11 fibroblasts                  | 15d-PGJ2           | <b>54,40</b>                           |
| MCM16 fibroblasts                 | 15d-PGJ2           | <b>68,22</b>                           |

**Table S1.** 15d-PGJ2 is superior to other PPAR ligands in inhibiting growth of melanoma cell lines, endothelial cells and of tumor associated fibroblasts superior to normal fibroblasts. Cell viability and proliferation assay. The IC50 is calculated of three independent experiments. IC50 of melanoma cells A375, M24met, 1205Lu, MelJuso and endothelial cells (HUVECs) treated with ciglitazone, troglitazone, 15d-PGJ2 and WY-14643, lymphatic endothelial cells (LECs), normal fibroblasts (NHDF) and tumor-associated fibroblasts treated with 15d-PGJ2.
