# Supplementary material for: Proteome Analysis Identified the PPARγ Ligand 15d-PGJ2 as a Novel Drug Inhibiting Melanoma Progression and Interfering with Tumor-Stroma Interaction
Source: PubMed Central journal article supplement (PMC3458105; doi:10.1371/journal.pone.0046103), 2012-09-25
Supplement: pone.0046103.s004.pdf [file pone.0046103.s004.pdf]

**Table S3: Downregulated candidates by 15d-PGJ2**

| <u>AccNr</u> | <u>Name</u>                                                      | <u>Control</u> | <u>15d-PGJ2 (5nM)</u> | <u>Function (Ref. Uniprot)</u>                                                                                                                                                                                                                                                                                                                                              |
|--------------|------------------------------------------------------------------|----------------|-----------------------|-----------------------------------------------------------------------------------------------------------------------------------------------------------------------------------------------------------------------------------------------------------------------------------------------------------------------------------------------------------------------------|
| Q13685       | Angio-associated migratory cell protein                          | 1              | 0                     | Plays a role in angiogenesis and cell migration.                                                                                                                                                                                                                                                                                                                            |
| Q16610       | Extracellular matrix protein 1 precursor                         | 1              | 0                     | Involved in endochondral bone formation as negative regulator of bone mineralization. Stimulates the proliferation of endothelial cells and promotes angiogenesis.                                                                                                                                                                                                          |
| Q6FI81       | Anamorsin                                                        | 1              | 0                     | May be required for the maturation of extramitochondrial Fe/S proteins. Has anti-apoptotic effects in the cell.                                                                                                                                                                                                                                                             |
| P11802       | Cell division protein kinase 4                                   | 1              | 0                     | Probably involved in the control of the cell cycle. Defects in CDK4 are a cause of susceptibility to cutaneous malignant melanoma type 3 (CMM3)                                                                                                                                                                                                                             |
| P50613       | Cell division protein kinase 7                                   | 1              | 0                     | Cyclin-dependent kinases (CDKs) are activated by the binding to a cyclin and mediate the progression through the cell cycle.                                                                                                                                                                                                                                                |
| P78396       | Cyclin-A1                                                        | 1              | 0                     | May be involved in the control of the cell cycle at the G1/S (start) and G2/M (mitosis) transitions.                                                                                                                                                                                                                                                                        |
| P51946       | Cyclin-H                                                         | 1              | 0                     | Regulates CDK7, the catalytic subunit of the CDK-activating kinase (CAK) enzymatic complex. Involved in cell cycle control                                                                                                                                                                                                                                                  |
| P14635       | G2/mitotic-specific cyclin-B1                                    | 1              | 0                     | Essential for the control of the cell cycle at the G2/M (mitosis) transition.                                                                                                                                                                                                                                                                                               |
| Q9BY12       | S phase cyclin A-associated protein in the endoplasmic reticulum | 1              | 0                     | CCNA2/CDK2 regulatory protein that transiently maintains CCNA2 in the cytoplasm                                                                                                                                                                                                                                                                                             |
| P43246       | DNA mismatch repair protein Msh2                                 | 4              | 1                     | Component of the post-replicative DNA mismatch repair system (MMR). Forms two different heterodimers: MutS alpha (MSH2-MSH6 heterodimer) and MutS beta (MSH2-MSH3 heterodimer) which binds to DNA mismatches thereby initiating DNA repair                                                                                                                                  |
| P08253       | Matrix metalloproteinase-2                                       | 1              | 0                     | Ubiquitous metalloproteinase that is involved in diverse functions such as remodeling of the vasculature, angiogenesis, tissue repair, tumor invasion, inflammation, and atherosclerotic plaque rupture.                                                                                                                                                                    |
| P35221       | Alpha-1 catenin                                                  | 2              | 1                     | Associates with the cytoplasmic domain of a variety of cadherins. The association of catenins to cadherins produces a complex which is linked to the actin filament network, and which seems to be of primary importance for cadherins cell-adhesion properties. Can associate with both E- and N-cadherins. May play a crucial role in cell differentiation.               |
| P35222       | Catenin beta-1                                                   | 1              | 0                     | Involved in the regulation of cell adhesion. The majority of beta-catenin is localized to the cell membrane and is part of E-cadherin/catenin adhesion complexes which are proposed to couple cadherins to the actin cytoskeleton. Ref.32                                                                                                                                   |
| O94776       | Metastasis-associated protein MTA2                               | 1              | 0                     | May be involved in the regulation of gene expression as repressor and activator. The repression might be related to covalent modification of histone proteins.                                                                                                                                                                                                              |
| O00560       | Syntenin-1                                                       | 1              | 0                     | Seems to function as an adapter protein. In adherens junctions may function to couple syndecans to cytoskeletal proteins or signaling components. Seems to couple transcription factor SOX4 to the IL-5 receptor (IL5RA). May also play a role in vesicular trafficking. Seems to be required for the targeting of TGFA to the cell surface in the early secretory pathway. |
| Q9NWT1       | p21-activated protein kinase-interacting protein 1               | 3              | 1                     | Negatively regulates the PAK1 kinase. PAK1 is a member of the PAK kinase family, which have been shown to play a positive role in the regulation of signaling pathways involving MAPK8 and RELA.                                                                                                                                                                            |
| P49023       | Paxillin                                                         | 2              | 0                     | Cytoskeletal protein involved in actin-membrane attachment at sites of cell adhesion to the extracellular matrix (focal adhesion).                                                                                                                                                                                                                                          |
| P08962       | Melanoma-associated antigen ME491                                | 1              | 0                     | This antigen is associated with early stages of melanoma tumor progression. May play a role in growth regulation.                                                                                                                                                                                                                                                           |
| P43355       | Melanoma-associated antigen 1                                    | 1              | 0                     | Not known, though may play a role in embryonal development and tumor transformation or aspects of tumor progression. Antigen recognized on a melanoma by autologous cytolytic T-lymphocytes.                                                                                                                                                                                |
| P62993       | Growth factor receptor-bound protein 2                           | 2              | 0                     | Adapter protein that provides a critical link between cell surface growth factor receptors and the Ras signaling pathway.                                                                                                                                                                                                                                                   |
| P12004       | Proliferating cell nuclear antigen (PCNA)                        | 6              | 4                     | This protein is an auxiliary protein of DNA polymerase delta and is involved in the control of eukaryotic DNA replication by increasing the polymerase's processibility during elongation of the leading strand                                                                                                                                                             |
| P46087       | Proliferating-cell nucleolar antigen p120                        | 6              | 3                     | May play a role in the regulation of the cell cycle and the increased nucleolar activity that is associated with the cell proliferation.                                                                                                                                                                                                                                    |
| Q9UQ80       | Proliferation-associated protein 2G4                             | 13             | 9                     | May play a role in a ERBB3-regulated signal transduction pathway. Seems be involved in growth regulation                                                                                                                                                                                                                                                                    |
| P06493       | Cell division control protein 2 homolog                          | 6              | 0                     | Plays a key role in the control of the eukaryotic cell cycle. It is required in higher cells for entry into S-phase and mitosis.                                                                                                                                                                                                                                            |

**Table S3.** Proteins downregulated by 5 $\mu$ M 15d-PGJ2 in A375 melanoma cells after 48 hours. Uniprot serves as reference for the function of the proteins. In addition, the accession numbers are from the Uniprot database. Numbers indicate distinct peptides identified by mass spectrometry.
