# Supplementary material for: Proteome Analysis Identified the PPARγ Ligand 15d-PGJ2 as a Novel Drug Inhibiting Melanoma Progression and Interfering with Tumor-Stroma Interaction
Source: PubMed Central journal article supplement (PMC3458105; doi:10.1371/journal.pone.0046103), 2012-09-25
Supplement: pone.0046103.s005.pdf [file pone.0046103.s005.pdf]

**Table S4: Regulated chaperones and Heat shock proteins by 15d-PGJ2**

| AccNr  | Name                                                                                        | control | 15-PGJ2 | $\Delta$ | SM-Score | Fraction |
|--------|---------------------------------------------------------------------------------------------|---------|---------|----------|----------|----------|
| P11142 | Heat shock cognate 71 kDa protein                                                           | 34      | 19      | -15      | 565.32   | C, S, N  |
| P08238 | Heat shock protein HSP 90-beta (HSP 90) (HSP 84)                                            | 33      | 18      | -15      | 528.87   | C, S, N  |
| P07900 | Heat shock protein HSP 90-alpha (HSP 86)                                                    | 33      | 20      | -13      | 544.13   | C, S, N  |
| P11021 | 78 kDa glucose-regulated protein (GRP 78)                                                   | 23      | 13      | -10      | 365.75   | C, S, N  |
| P17987 | T-complex protein 1 subunit alpha (TCP-1-alpha)                                             | 20      | 10      | -10      | 320.94   | C, N     |
| P49368 | T-complex protein 1 subunit gamma (TCP-1-gamma) (CCT-gamma) (hTRiC5)                        | 15      | 5       | -10      | 230.97   | C, N     |
| P10809 | 60 kDa heat shock protein, mitochondrial (Heat shock protein 60) (HSP-60)                   | 36      | 28      | -8       | 648.87   | C, N     |
| P14625 | Endoplasmic reticulum chaperone protein (Heat shock protein 90 kDa beta member 1)           | 17      | 9       | -8       | 238.31   | C, N     |
| P30101 | Protein disulfide-isomerase A3 (Disulfide isomerase ER-60)                                  | 11      | 3       | -8       | 154.12   | C, N     |
| P48643 | T-complex protein 1 subunit epsilon                                                         | 18      | 10      | -8       | 268.49   | C, N     |
| P50990 | T-complex protein 1 subunit theta (TCP-1-theta)                                             | 17      | 9       | -8       | 249.51   | C, N     |
| Q92598 | Heat shock protein 105 kDa (Heat shock 110 kDa protein)                                     | 15      | 8       | -7       | 219.83   | C, N     |
| P78371 | T-complex protein 1 subunit beta (TCP-1-beta)                                               | 23      | 16      | -7       | 365.17   | C, N     |
| P38646 | Stress-70 protein, mitochondrial (75 kDa glucose-regulated protein)                         | 13      | 7       | -6       | 201.73   | C, N     |
| P34932 | Heat shock 70 kDa protein 4                                                                 | 15      | 10      | -5       | 240.88   | C, N     |
| P04792 | Heat shock protein beta-1 (HspB1) (Heat shock 27 kDa protein) (HSP 27)                      | 8       | 3       | -5       | 108.88   | C, N     |
| P50991 | T-complex protein 1 subunit delta (TCP-1-delta) (CCT-delta) (Stimulator of TAR RNA-binding) | 15      | 10      | -5       | 264.13   | C, N     |
| Q99832 | T-complex protein 1 subunit eta (TCP-1-eta)                                                 | 16      | 11      | -5       | 253.33   | C, N     |
| P61604 | 10 kDa heat shock protein, mitochondrial (Hsp10)                                            | 7       | 3       | -4       | 109.65   | C, S, N  |
| P40227 | T-complex protein 1 subunit zeta (TCP-1-zeta)                                               | 19      | 15      | -4       | 346.23   | C, N     |
| P27797 | Calreticulin (CRP55) (Calregulin)                                                           | 5       | 2       | -3       | 81.21    | C, N     |
| P08107 | Heat shock 70 kDa protein 1 (HSP70.1) (HSP70-1/HSP70-2)                                     | 15      | 12      | -3       | 228.12   | C, N     |
| P07237 | Protein disulfide-isomerase (PDI)                                                           | 9       | 6       | -3       | 149.75   | C, N     |
| Q58FF8 | Putative heat shock protein HSP 90-beta 2                                                   | 6       | 3       | -3       | 96.45    | C, N     |
| Q9NQP4 | Prefoldin subunit 4 (Protein C-1)                                                           | 4       | 2       | -2       | 67.02    | C, N     |
| Q99471 | Prefoldin subunit 5 (C-myc-binding protein Mm-1)                                            | 5       | 3       | -2       | 96.61    | C, N     |
| P30040 | Endoplasmic reticulum protein ERp29                                                         | 8       | 7       | -1       | 109.52   | C, N     |
| P34931 | Heat shock 70 kDa protein 1L                                                                | 6       | 5       | -1       | 107.92   | C, N     |
| P61758 | Prefoldin subunit 3                                                                         | 3       | 2       | -1       | 50.65    | C, N     |
| P13667 | Protein disulfide-isomerase A4                                                              | 3       | 2       | -1       | 40.84    | C, N     |
| Q15084 | Protein disulfide-isomerase A6                                                              | 8       | 7       | -1       | 124.13   | C, N     |
| Q96JJ7 | Protein disulfide-isomerase TMX3                                                            | 1       | 1       | -1       | 11.91    | C        |
| Q96MM6 | Heat shock 70 kDa protein 12B                                                               | 1       | 1       | 0        | 12.1     | N        |
| P17066 | Heat shock 70 kDa protein 6                                                                 | 4       | 4       | 0        | 70.85    | C, N     |
| O60925 | Prefoldin subunit 1                                                                         | 1       | 1       | 0        | 16.45    | C, N     |
| Q9UHV9 | Prefoldin subunit 2                                                                         | 4       | 4       | 0        | 60.91    | C, S, N  |
| O15212 | Prefoldin subunit 6                                                                         | 5       | 5       | 0        | 64.16    | C, N     |

**Table S4:** Chaperones regulated by 5 $\mu$ M 15d-PGJ2 in A375 melanoma cells after 48 hours. The accession numbers are from the Uniprot database. Numbers indicate distinct peptides identified by mass spectrometry. C: cytoplasm, N: nucleus, S: supernatant.
